# Supplementary material
Source: Springer Nature journal article supplement (https://www.springermedizin.de/resource/supplementary/12881_2009_622_MOESM9_ESM.pdf/9451084)

**A**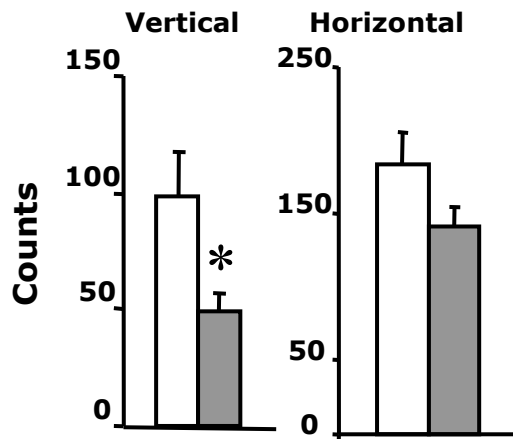**B**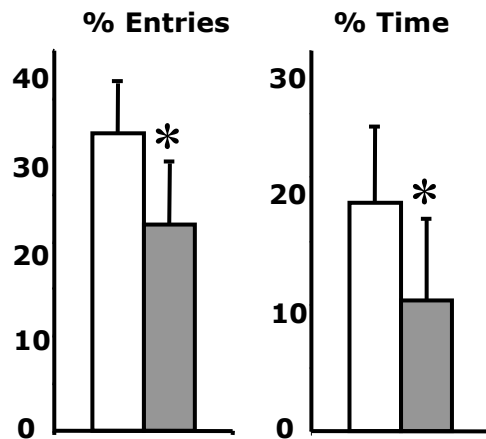**C**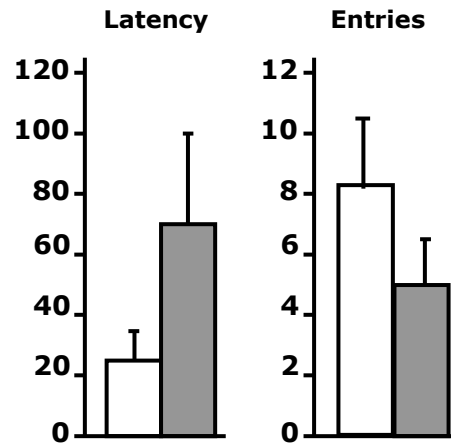**D**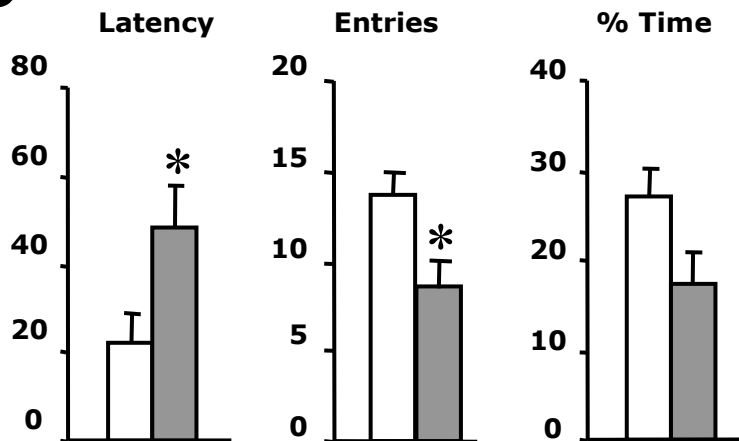**E**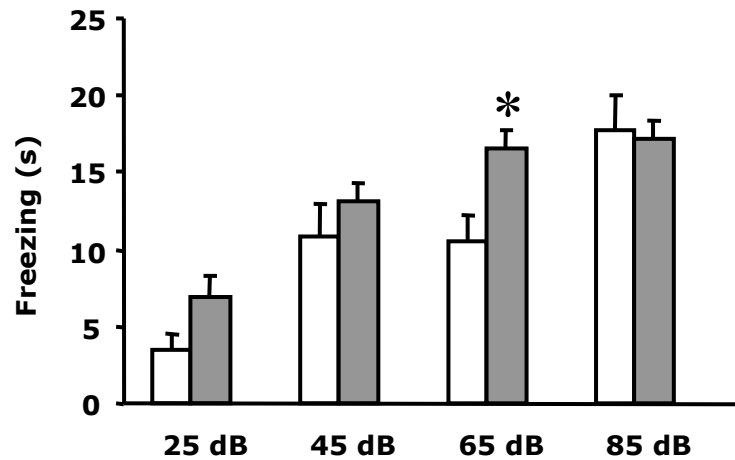

Supplement: MOESM9 [file 9451084]
